# Supplementary material for: About miRNAs, miRNA seeds, target genes and target pathways
Source: PubMed Central journal article supplement (PMC5739805; doi:10.18632/oncotarget.22363), 2017-11-09
Supplement: oncotarget-08-107167-s001.pdf [file oncotarget-08-107167-s001.pdf]

## About miRNAs, miRNA seeds, target genes and target pathways

### SUPPLEMENTARY MATERIALS

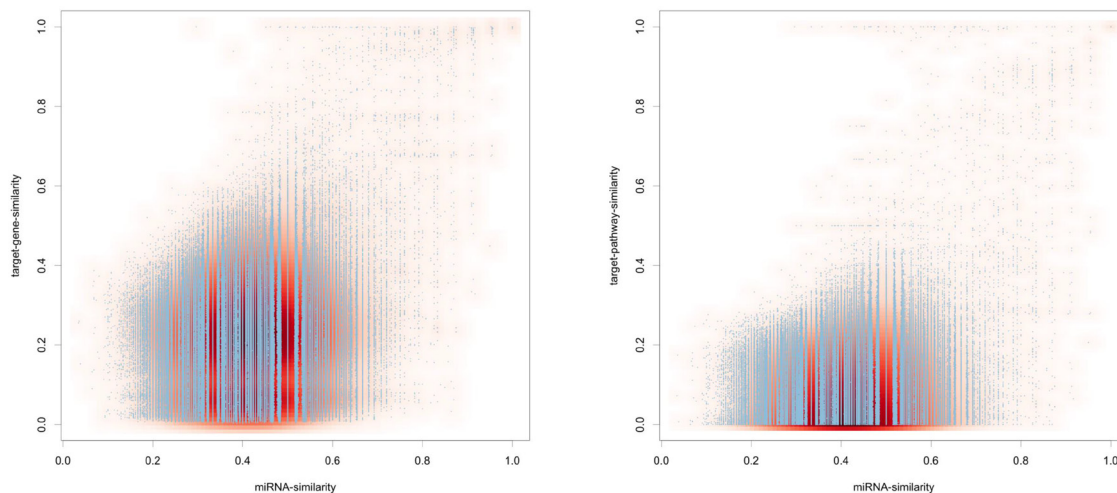

**Supplementary Figure 1: Scatter Plot for the miRNA similarity versus target gene similarity (left) and miRNA similarity versus target pathway similarity (right).**

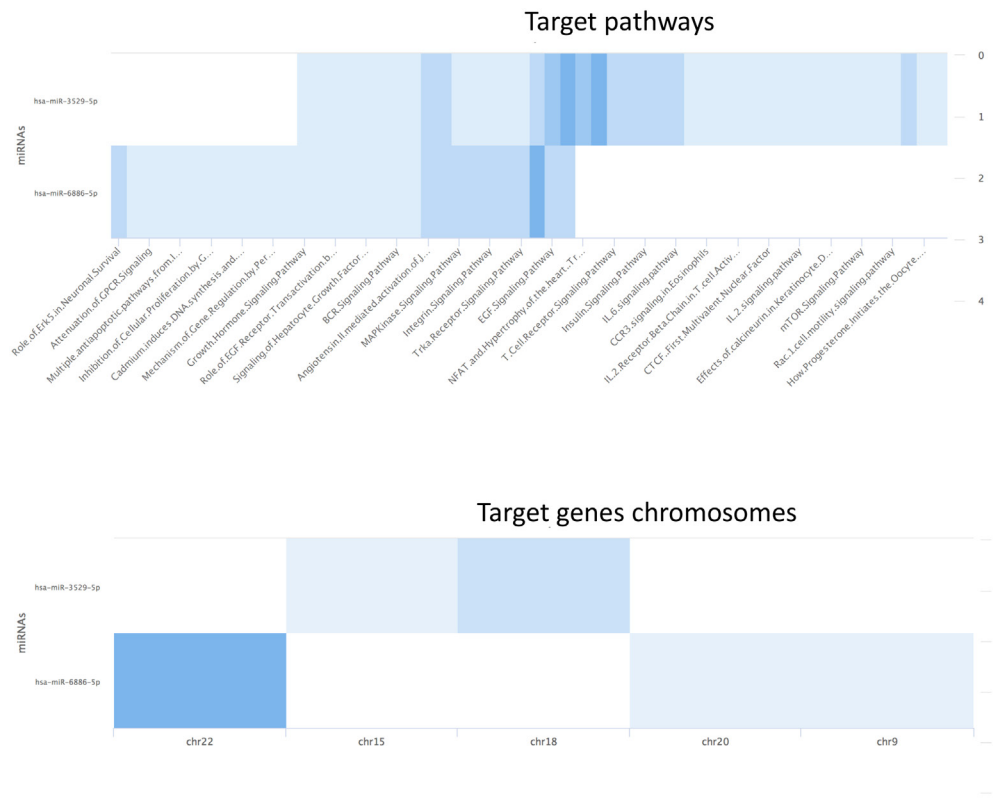

Supplementary Figure 2: Heat map for two miRNAs and target pathways (upper part) and chromosomes (lower part).

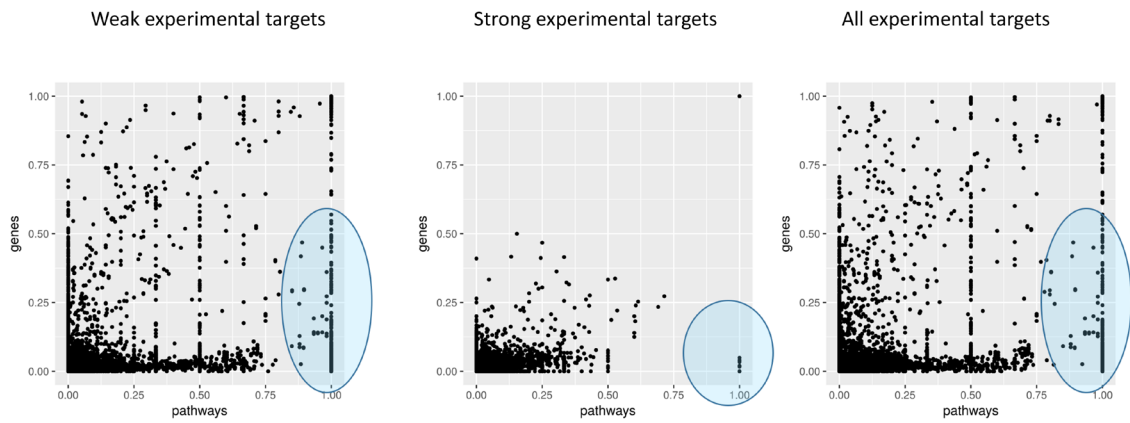

**Supplementary Figure 3: Scatter plots of target pathway versus target gene gene similarity for weak evidence targets (left panel), strong evidence targets (middle panel) and all targets with experimental evidence (right panel). The area of interest described in the manuscript is highlighted in blue.**

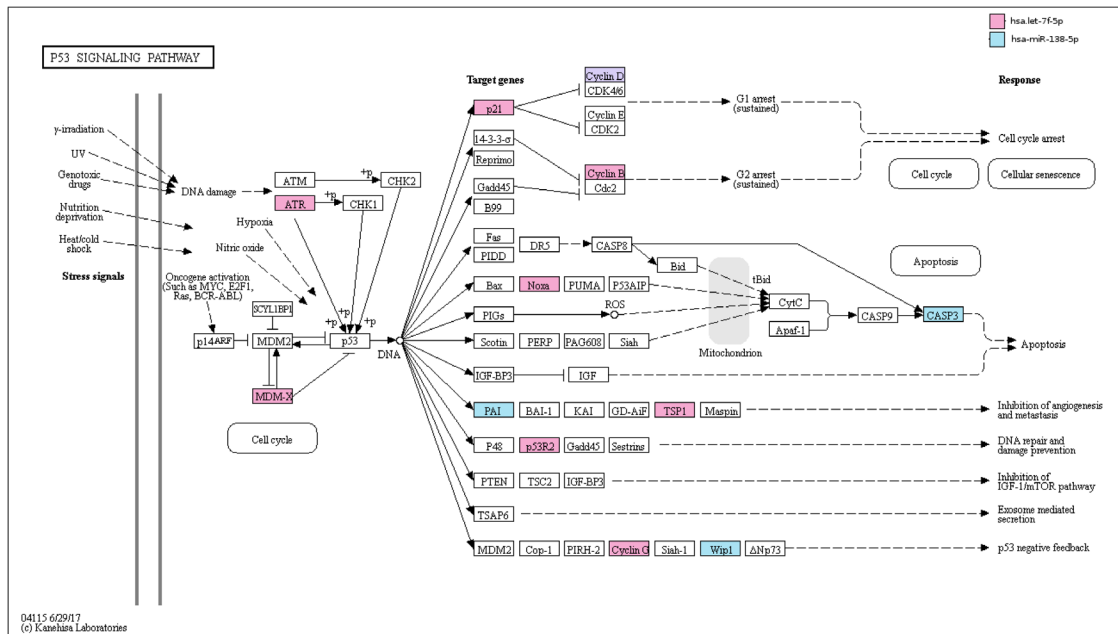

**Supplementary Figure 4:** experimental targets of the two miRNAs on the p53 signalling cascade. Targets are highlighted in different colors, only one purple target overlaps between both miRNAs.
